# Supplementary material
Source: publisher site journal article supplement (https://www.dovepress.com/article/441231)
Supplement: Supplementary file 1 [file get_supplementary_file.php]

**Supplementary Table 1:** Target genes of antidiabetic drugs

| <b>Drug classification</b> | <b>Drug target genes in drugbank</b> | <b>Drug target genes in chEMBL</b> | <b>Gene region (GRCh37,p13)</b> |
|----------------------------|--------------------------------------|------------------------------------|---------------------------------|
| Su                         | <i>KCNJ11</i>                        | <i>KCNJ11</i>                      | chr11: 17,386,719-17,410,878    |
|                            | <i>ABCC8</i>                         | <i>ABCC8</i>                       | chr11: 17,414,045-17,498,441    |
| TZD                        | <i>PPARG</i>                         | <i>PPARG</i>                       | chr3: 12,328,867-12,475,855     |
| Insulin/insulin analogues  | <i>INSR</i>                          | <i>INSR</i>                        | chr19: 7,112,266-7,294,425      |
| GLP-1 analogues            | <i>GLP1R</i>                         | <i>GLP1R</i>                       | chr6: 39,016,557-39,059,079     |
| SGLT2 inhibitor            | <i>SLC5A2</i>                        | <i>SLC5A2</i>                      | chr16: 31,494,323-31,502,181    |
| DPP-IV inhibitor           | <i>DPP4</i>                          | <i>DPP4</i>                        | chr2: 162,848,755-162,930,904   |
| Metformin                  | <i>PRKAB1</i>                        | 58 <i>encoding genes</i>           | NA                              |
|                            | <i>ETFDH</i>                         | <i>GPD2</i>                        | NA                              |

**Abbreviations:** Su, Sulfonylureas; TZD, Thiazolidinediones; GLP-1, Glucagon-like peptide 1; SGLT2, Sodium-glucose cotransporter 2; DPP-IV, Dipeptidyl peptidase 4.

**Supplementary Table 2:** The results of the target genes of hypoglycemic agents and glyceemic traits

| Gene          | tissue | probeID         | Probe-<br>Chr | Probe_<br>bp | topSNP     | topSNP<br>_bp | A1 A2 | Freq     | b_GWAS  | se_<br>GWAS | p_<br>GWAS | b_<br>eQTL | se_<br>eQTL | p_<br>eQTL | b_<br>SMR | se_<br>SMR | p_<br>SMR  | p_<br>HEIDI | n SNP_<br>HEIDI |
|---------------|--------|-----------------|---------------|--------------|------------|---------------|-------|----------|---------|-------------|------------|------------|-------------|------------|-----------|------------|------------|-------------|-----------------|
| <b>SLC5A2</b> |        |                 |               |              |            |               |       |          |         |             |            |            |             |            |           |            |            |             |                 |
| FBG           | blood  | ENSG00000140675 | 16            | 31498252     | rs6565236  | 31517648      | T A   | 0.254601 | -0.0003 | 0.0021      | 7.60E-01   | 0.0565541  | 0.0092536   | 9.86E-10   | -0.005305 | 0.0371427  | 8.86E-01   | NA          | NA              |
| HbA1c         | blood  | ENSG00000140675 | 16            | 31498252     | rs6565236  | 31517648      | T A   | 0.254601 | -0.0051 | 0.0015      | 1.28E-03   | 0.0565541  | 0.0092536   | 9.86E-10   | -0.090179 | 0.0303514  | 2.97E-03** | NA          | NA              |
| T2D           | blood  | ENSG00000140675 | 16            | 31498252     | rs6565236  | 31517648      | T A   | 0.254601 | -0.0078 | 0.0072      | 2.80E-01   | 0.0565541  | 0.0092536   | 9.86E-10   | -0.137921 | 0.129296   | 2.86E-01   | NA          | NA              |
| <b>DPP4</b>   |        |                 |               |              |            |               |       |          |         |             |            |            |             |            |           |            |            |             |                 |
| FBG           | blood  | ENSG00000197635 | 2             | 162889901    | rs13015258 | 162930725     | T G   | 0.403885 | 0.0016  | 0.002       | 5.27E-01   | 0.128405   | 0.0081612   | 8.90E-56   | 0.0124606 | 0.0155959  | 4.24E-01   | 7.38E-01    | 20              |
| HbA1c         | blood  | ENSG00000197635 | 2             | 162889901    | rs13015258 | 162930725     | T G   | 0.403885 | 0.0022  | 0.0015      | 7.62E-02   | 0.128405   | 0.0081612   | 8.90E-56   | 0.0171334 | 0.0117325  | 1.44E-01   | 2.65E-01    | 20              |
| T2D           | blood  | ENSG00000197635 | 2             | 162889901    | rs13015258 | 162930725     | T G   | 0.403885 | 0.0137  | 0.0066      | 3.78E-02   | 0.128405   | 0.0081612   | 8.90E-56   | 0.106694  | 0.0518455  | 3.96E-02*  | 1.87E-01    | 20              |
| <b>INSR</b>   |        |                 |               |              |            |               |       |          |         |             |            |            |             |            |           |            |            |             |                 |
| FBG           | blood  | ENSG00000171105 | 19            | 7203155      | rs4640294  | 7297710       | G A   | 0.259714 | 0.0011  | 0.0026      | 4.17E-01   | 0.0867737  | 0.009791    | 7.82E-19   | 0.0126767 | 0.0299971  | 6.73E-01   | 9.29E-01    | 12              |
| HbA1c         | blood  | ENSG00000171105 | 19            | 7203155      | rs4640294  | 7297710       | G A   | 0.259714 | -0.003  | 0.0019      | 4.44E-02   | 0.0867737  | 0.009791    | 7.82E-19   | -0.034573 | 0.0222408  | 1.20E-01   | 6.09E-01    | 12              |
| T2D           | blood  | ENSG00000171105 | 19            | 7203155      | rs4640294  | 7297710       | G A   | 0.259714 | 0.0163  | 0.0081      | 4.32E-02   | 0.0867737  | 0.009791    | 7.82E-19   | 0.187845  | 0.0957223  | 4.97E-02*  | 4.43E-01    | 12              |
| <b>GLPIR</b>  |        |                 |               |              |            |               |       |          |         |             |            |            |             |            |           |            |            |             |                 |
| FBG           | blood  | ENSG00000112164 | 6             | 39036046     | rs9283907  | 39026703      | A G   | 0.170757 | 0.0072  | 0.0023      | 6.47E-03   | 0.101336   | 0.0115312   | 1.52E-18   | 0.0710507 | 0.0240937  | 3.19E-03** | 2.26E-05*** | 6               |
| HbA1c         | blood  | ENSG00000112164 | 6             | 39036046     | rs9283907  | 39026703      | A G   | 0.170757 | -0.0018 | 0.0018      | 2.42E-01   | 0.101336   | 0.0115312   | 1.52E-18   | -0.017763 | 0.0178773  | 3.20E-01   | 5.13E-01    | 6               |
| T2D           | blood  | ENSG00000112164 | 6             | 39036046     | rs9283907  | 39026703      | A G   | 0.170757 | -0.0035 | 0.009       | 6.98E-01   | 0.101336   | 0.0115312   | 1.52E-18   | -0.034539 | 0.0889003  | 6.98E-01   | 1.23E-03**  | 6               |
| <b>PPARG</b>  |        |                 |               |              |            |               |       |          |         |             |            |            |             |            |           |            |            |             |                 |
| FBG           | blood  | ENSG00000132170 | 3             | 12402361     | rs1699346  | 12504295      | C A   | 0.429448 | -0.0016 | 0.0018      | 2.73E-01   | 0.252822   | 0.0079468   | 4.09E-222  | -0.006329 | 0.0071224  | 3.74E-01   | 7.17E-01    | 20              |
| HbA1c         | blood  | ENSG00000132170 | 3             | 12402361     | rs1699346  | 12504295      | C A   | 0.429448 | 0.0036  | 0.0014      | 3.56E-03   | 0.252822   | 0.0079468   | 4.09E-222  | 0.0142393 | 0.0055556  | 1.04E-02*  | 1.46E-01    | 20              |
| T2D           | blood  | ENSG00000132170 | 3             | 12402361     | rs1699346  | 12504295      | C A   | 0.429448 | 0.0162  | 0.0065      | 1.26E-02   | 0.252822   | 0.0079468   | 4.09E-222  | 0.0640767 | 0.0257886  | 1.30E-02*  | 1.14E-01    | 20              |
| <b>KCNJ11</b> |        |                 |               |              |            |               |       |          |         |             |            |            |             |            |           |            |            |             |                 |

|              |                  |                 |    |          |            |          |   |   |          |         |        |          |          |           |           |           |           |             |          |    |
|--------------|------------------|-----------------|----|----------|------------|----------|---|---|----------|---------|--------|----------|----------|-----------|-----------|-----------|-----------|-------------|----------|----|
| FBG          | blood            | ENSG00000187486 | 11 | 17409142 | rs2074310  | 17421886 | T | C | 0.353783 | 0.0019  | 0.0017 | 0.4167   | 0.157188 | 0.012183  | 4.374E-38 | 0.0120874 | 0.0108556 | 0.265504    | 0.989267 | 20 |
| HbA1c        | blood            | ENSG00000187486 | 11 | 17409142 | rs2074310  | 17421886 | T | C | 0.353783 | 0.0034  | 0.0013 | 0.02584  | 0.157188 | 0.012183  | 4.374E-38 | 0.0216301 | 0.0084386 | 0.01037*    | 0.516576 | 20 |
| T2D          | blood            | ENSG00000187486 | 11 | 17409142 | rs2074310  | 17421886 | T | C | 0.353783 | 0.0684  | 0.0066 | 3.41E-25 | 0.157188 | 0.012183  | 4.374E-38 | 0.435148  | 0.053856  | 6.49E-16*** | 0.097348 | 20 |
| <b>ABCC8</b> |                  |                 |    |          |            |          |   |   |          |         |        |          |          |           |           |           |           |             |          |    |
| FBG          | Colon_Transverse | ENSG00000006071 | 11 | 17414432 | rs985136   | 17497794 | G | C | 0.48773  | -0.0007 | 0.0022 | 0.5906   | 0.357268 | 0.052859  | 1.391E-11 | -0.001959 | 0.0061647 | 0.750614    | 0.992125 | 3  |
| FBG          | Colon_Sigmoid    | ENSG00000006071 | 11 | 17414432 | rs77889556 | 17498057 | A | G | 0.171779 | -0.0005 | 0.0032 | 0.9366   | 0.562989 | 0.0687618 | 2.667E-16 | -0.000888 | 0.005685  | 0.875858    | 0.897742 | 4  |
| HbA1c        | Colon_Transverse | ENSG00000006071 | 11 | 17414432 | rs985136   | 17497794 | G | C | 0.48773  | 0.0035  | 0.0017 | 0.01646  | 0.357268 | 0.052859  | 1.391E-11 | 0.0097966 | 0.0049742 | 0.048898*   | 0.669114 | 3  |
| HbA1c        | Colon_Sigmoid    | ENSG00000006071 | 11 | 17414432 | rs77889556 | 17498057 | A | G | 0.171779 | 0.0037  | 0.0023 | 0.0499   | 0.562989 | 0.0687618 | 2.667E-16 | 0.0065721 | 0.0041635 | 0.114447    | 0.358361 | 4  |
| T2D          | Colon_Transverse | ENSG00000006071 | 11 | 17414432 | rs985136   | 17497794 | G | C | 0.48773  | 0.002   | 0.0067 | 0.7653   | 0.357268 | 0.052859  | 1.391E-11 | 0.005598  | 0.0187717 | 0.765538    | 0.545427 | 3  |
| T2D          | Colon_Sigmoid    | ENSG00000006071 | 11 | 17414432 | rs77889556 | 17498057 | A | G | 0.171779 | -0.0035 | 0.0091 | 0.7008   | 0.562989 | 0.0687618 | 2.667E-16 | -0.006217 | 0.0161816 | 0.700836    | 0.522549 | 4  |

**Notes:** \* $P < 0.05$ , \*\* $P < 0.01$ , \*\*\* $P < 0.001$ .

**Abbreviations:** SNP, single nucleotide polymorphism; GWAS, genome wide association study; eQTL, expression quantitative trait loci; SMR, Summary-data-based Mendelian Randomization; HEIDI, heterogeneity in dependent instruments; FBG, fasting blood glucose; HbA1c, Glycated hemoglobin A1c; T2D, Type 2 Diabetes.

**Supplementary Table 3: Relationship between cis-eQTL of antidiabetic drug targets genes and IBD**

| Gene          | tissue           | probeID         | ProbeChr | Probe<br>_bp | topSNP     | topSNP<br>_bp | A1 A2 | Freq     | b_<br>GWAS | se_<br>GWAS | p_<br>GWAS | b_<br>eQTL | se_<br>eQTL | F value  | p_<br>eQTL | b_<br>SMR | se_<br>SMR | p_<br>SMR   | p_<br>HEIDI | nsp_<br>HEIDI |
|---------------|------------------|-----------------|----------|--------------|------------|---------------|-------|----------|------------|-------------|------------|------------|-------------|----------|------------|-----------|------------|-------------|-------------|---------------|
| <b>SLC5A2</b> |                  |                 |          |              |            |               |       |          |            |             |            |            |             |          |            |           |            |             |             |               |
| UC            | blood            | ENSG00000140675 | 16       | 31498252     | rs6565236  | 31517648      | T A   | 0.254601 | 0.0013     | 0.0179      | 0.9437     | 0.0565541  | 0.00925357  | 37.35163 | 9.864E-10  | 0.0229868 | 0.316533   | 0.9421081   | NA          | NA            |
| CD            | blood            | ENSG00000140675 | 16       | 31498252     | rs6565236  | 31517648      | T A   | 0.254601 | 0.0383     | 0.0183      | 0.03611    | 0.0565541  | 0.00925357  | 37.35163 | 9.864E-10  | 0.677228  | 0.342031   | 0.0477017*  | NA          | NA            |
| IBD           | blood            | ENSG00000140675 | 16       | 31498252     | rs6565236  | 31517648      | T A   | 0.254601 | 0.0207     | 0.0141      | 0.1432     | 0.0565541  | 0.00925357  | 37.35163 | 9.864E-10  | 0.366021  | 0.256411   | 0.1534421   | NA          | NA            |
| <b>DPP4</b>   |                  |                 |          |              |            |               |       |          |            |             |            |            |             |          |            |           |            |             |             |               |
| UC            | blood            | ENSG00000197635 | 2        | 162889901    | rs13015258 | 162930725     | T G   | 0.403885 | 0.0008     | 0.0168      | 0.9633     | 0.128405   | 0.00816117  | 247.5478 | 8.9E-56    | 0.0062303 | 0.130837   | 0.96202     | 0.0396659*  | 20            |
| CD            | blood            | ENSG00000197635 | 2        | 162889901    | rs13015258 | 162930725     | T G   | 0.403885 | -0.0178    | 0.0171      | 0.2985     | 0.128405   | 0.00816117  | 247.5478 | 8.9E-56    | -0.138624 | 0.133464   | 0.2989606   | 0.0034266** | 20            |
| IBD           | blood            | ENSG00000197635 | 2        | 162889901    | rs13015258 | 162930725     | T G   | 0.403885 | -0.0037    | 0.0132      | 0.7766     | 0.128405   | 0.00816117  | 247.5478 | 8.9E-56    | -0.028815 | 0.102816   | 0.7792791   | 0.0055844** | 20            |
| <b>INSR</b>   |                  |                 |          |              |            |               |       |          |            |             |            |            |             |          |            |           |            |             |             |               |
| UC            | blood            | ENSG00000171105 | 19       | 7203155      | rs4640294  | 7297710       | G A   | 0.259714 | -0.0369    | 0.0211      | 0.08056    | 0.0867737  | 0.009791    | 78.54565 | 7.817E-19  | -0.425244 | 0.24785    | 0.0862113   | 0.0046835** | 11            |
| IBD           | blood            | ENSG00000171105 | 19       | 7203155      | rs4640294  | 7297710       | G A   | 0.259714 | -0.0167    | 0.0166      | 0.3158     | 0.0867737  | 0.009791    | 78.54565 | 7.817E-19  | -0.192455 | 0.192531   | 0.3175019   | 0.0274903*  | 11            |
| CD            | blood            | ENSG00000171105 | 19       | 7203155      | rs4640294  | 7297710       | G A   | 0.259714 | -0.0097    | 0.0213      | 0.6494     | 0.0867737  | 0.009791    | 78.54565 | 7.817E-19  | -0.111785 | 0.24579    | 0.6492538   | 0.3010623   | 11            |
| <b>PPARG</b>  |                  |                 |          |              |            |               |       |          |            |             |            |            |             |          |            |           |            |             |             |               |
| UC            | blood            | ENSG00000132170 | 3        | 12402361     | rs1699346  | 12504295      | C A   | 0.429448 | -0.0007    | 0.0161      | 0.9629     | 0.252822   | 0.00794678  | 1012.156 | 4.09E-222  | -0.002769 | 0.063681   | 0.9653203   | 0.1814279   | 20            |
| CD            | blood            | ENSG00000132170 | 3        | 12402361     | rs1699346  | 12504295      | C A   | 0.429448 | -0.0379    | 0.0164      | 0.02059    | 0.252822   | 0.00794678  | 1012.156 | 4.09E-222  | -0.149908 | 0.065039   | 0.021172*   | 0.5516316   | 20            |
| IBD           | blood            | ENSG00000132170 | 3        | 12402361     | rs1699346  | 12504295      | C A   | 0.429448 | -0.0156    | 0.0127      | 0.2177     | 0.252822   | 0.00794678  | 1012.156 | 4.09E-222  | -0.061704 | 0.05027    | 0.2196603   | 0.6970488   | 20            |
| <b>KCNJ11</b> |                  |                 |          |              |            |               |       |          |            |             |            |            |             |          |            |           |            |             |             |               |
| UC            | blood            | ENSG00000187486 | 11       | 17409142     | rs2074310  | 17421886      | T C   | 0.353783 | -0.0079    | 0.0167      | 0.6347     | 0.157188   | 0.012183    | 166.4678 | 4.374E-38  | -0.050258 | 0.106314   | 0.6364014   | 0.0014916** | 20            |
| CD            | blood            | ENSG00000187486 | 11       | 17409142     | rs2074310  | 17421886      | T C   | 0.353783 | -0.05      | 0.0169      | 0.00307    | 0.157188   | 0.012183    | 166.4678 | 4.374E-38  | -0.31809  | 0.110305   | 0.0039299** | 0.0554526   | 20            |
| IBD           | blood            | ENSG00000187486 | 11       | 17409142     | rs2074310  | 17421886      | T C   | 0.353783 | -0.0287    | 0.0131      | 0.02821    | 0.157188   | 0.012183    | 166.4678 | 4.374E-38  | -0.182584 | 0.084533   | 0.0307787*  | 0.0015131** | 20            |
| <b>ABCC8</b>  |                  |                 |          |              |            |               |       |          |            |             |            |            |             |          |            |           |            |             |             |               |
| UC            | Colon_Transverse | ENSG00000006071 | 11       | 17414432     | rs985136   | 17497794      | G C   | 0.48773  | 0.0257     | 0.0175      | 0.1424     | 0.357268   | 0.052859    | 45.68255 | 1.391E-11  | 0.0719348 | 0.050126   | 0.1512625   | 0.899315    | 3             |

|     |                  |                 |    |          |          |          |     |         |        |        |         |          |          |          |           |           |          |           |           |   |
|-----|------------------|-----------------|----|----------|----------|----------|-----|---------|--------|--------|---------|----------|----------|----------|-----------|-----------|----------|-----------|-----------|---|
| CD  | Colon_Transverse | ENSG00000006071 | 11 | 17414432 | rs985136 | 17497794 | G C | 0.48773 | 0.0336 | 0.0178 | 0.05975 | 0.357268 | 0.052859 | 45.68255 | 1.391E-11 | 0.094047  | 0.051729 | 0.0690537 | 0.3963732 | 3 |
| IBD | Colon_Transverse | ENSG00000006071 | 11 | 17414432 | rs985136 | 17497794 | G C | 0.48773 | 0.0249 | 0.0138 | 0.07063 | 0.357268 | 0.052859 | 45.68255 | 1.391E-11 | 0.0696956 | 0.039979 | 0.0812818 | 0.7073304 | 3 |

**Notes:** \* $P < 0.05$ , \*\* $P < 0.01$ .

**Abbreviations:** SNP, single nucleotide polymorphism; GWAS, genome wide association study; eQTL, expression quantitative trait loci; SMR, Summary-data-based Mendelian Randomization; HEIDI, heterogeneity in dependent instruments; IBD, inflammatory bowel disease; UC, ulcerative colitis; CD, Crohn's disease.

**Supplementary Table 4:** IV of T2D-mediated *KCNJ11* and the data regarding IBD/UC/CD

| Gene/phenotypes | SNP      | effect_allele | other_allele | beta    | eaf    | se     | F value  | pval     |
|-----------------|----------|---------------|--------------|---------|--------|--------|----------|----------|
| <i>KCNJ11</i>   | rs757110 | A             | C            | -0.0691 | 0.6279 | 0.0066 | 109.6146 | 1.12E-25 |
| CD              | rs757110 | A             | C            | 0.0514  | /      | 0.0166 | /        | 0.0020   |
| UC              | rs757110 | A             | C            | 0.0064  | /      | 0.0165 | /        | 0.6987   |
| IBD             | rs757110 | A             | C            | 0.0284  | /      | 0.0129 | /        | 0.0279   |

**Abbreviations:** IV, instrumental variable; SNP, single nucleotide polymorphism; IBD, inflammatory bowel disease; UC, ulcerative colitis; CD, Crohn's disease.

**Supplementary Table 5:** IVs of T2D-mediated *PPARG* and the data regarding IBD/UC/CD

| SNP        | <i>PPARG</i>  |              |         |        |        |         | CD   |         |        | UC     |        |        | IBD    |        |        |        |
|------------|---------------|--------------|---------|--------|--------|---------|------|---------|--------|--------|--------|--------|--------|--------|--------|--------|
|            | effect_allele | other_allele | beta    | eaf    | se     | F value | pval | beta    | se     | pval   | beta   | se     | pval   | beta   | se     | pval   |
| rs11709077 | A             | G            | -0.1040 | 0.1264 | 0.0097 | 114.954 | 1.26 | -0.0087 | 0.0249 | 0.7252 | 0.0143 | 0.0242 | 0.5546 | 0.0070 | 0.0191 | 0.7126 |
|            |               |              |         |        |        |         | E-26 |         |        |        |        |        |        |        |        |        |
| rs4518111  | A             | C            | 0.0468  | 0.4338 | 0.0067 | 48.791  | 2.87 | -0.0017 | 0.0164 | 0.9174 | 0.0101 | 0.0162 | 0.5331 | 0.0035 | 0.0127 | 0.7818 |
|            |               |              |         |        |        |         | E-12 |         |        |        |        |        |        |        |        |        |

**Abbreviations:** IVs, instrumental variables; SNP, single nucleotide polymorphism; IBD, inflammatory bowel disease; UC, ulcerative colitis; CD, Crohn's disease.

**Supplementary Table 6:** IVs of HbA1c-mediated *PPARG* and the data regarding IBD/UC/CD

| SNP        | <i>PPARG</i>  |              |        |       |        |         | CD   |         |        | UC     |        |        | IBD    |         |        |        |
|------------|---------------|--------------|--------|-------|--------|---------|------|---------|--------|--------|--------|--------|--------|---------|--------|--------|
|            | effect_allele | other_allele | beta   | eaf   | se     | F value | pval | beta    | se     | pval   | beta   | se     | pval   | beta    | se     | pval   |
| rs1177809  | A             | G            | 0.0083 | 0.64  | 0.0013 | 40.763  | 2.6E | 0.0029  | 0.017  | 0.8671 | 0.0194 | 0.0167 | 0.2468 | 0.0104  | 0.0132 | 0.4276 |
|            |               |              |        |       |        |         | -10  |         |        |        |        |        |        |         |        |        |
| rs12491937 | A             | G            | 0.009  | 0.555 | 0.0013 | 47.929  | 1.4E | -0.0161 | 0.0163 | 0.3226 | 0.0165 | 0.0161 | 0.3043 | -0.0001 | 0.0126 | 0.9934 |
|            |               |              |        |       |        |         | -13  |         |        |        |        |        |        |         |        |        |

**Abbreviations:** IVs, instrumental variables; HbA1c, Glycated hemoglobin A1c; SNP, single nucleotide polymorphism; IBD, inflammatory bowel disease; UC, ulcerative colitis; CD, Crohn's disease.

**Supplementary Table 7:** Association between HbA1c-mediated *PPARG* and IBD (Results based on TSMR)

| Phenotypes | Method | OR (95%CI)            | P value |
|------------|--------|-----------------------|---------|
| UC         | IVW    | 7.813 (0.569,107.359) | 0.124   |
| CD         | IVW    | 0.427 (0.030, 6.102)  | 0.531   |
| IBD        | IVW    | 1.717 (0.219,13.470)  | 0.607   |

**Abbreviations:** IVs, instrumental variables; HbA1c, Glycated hemoglobin A1c; SNP, single nucleotide polymorphism; IBD, inflammatory bowel disease; UC, ulcerative colitis; CD, Crohn's disease; IVW, inverse-variance weighted; TSMR, Two Sample Mendelian Randomization; OR, odd ratio; CI, confidence interval.

**Supplementary Table 8:** Results of colocalization analysis of cis-eQTL in *KCNJ11* region and CD

| PP.H0.abf                              | PP.H1.abf | P.H2.abf | PP.H3.abf | PP.H4.abf |
|----------------------------------------|-----------|----------|-----------|-----------|
| 4.95e-26                               | 3.25e-26  | 2.87e-01 | 1.88e-01  | 5.25e-01  |
| [1] "PP abf for shared variant: 52.5%" |           |          |           |           |

**Abbreviations:** eQTL, expression quantitative trait loci; CD, Crohn's disease.

**Supplementary Table 9:** Heterogeneity of T2D-mediated *PPARG*

| Phenotypes | P value of heterogeneity |
|------------|--------------------------|
| UC         | 0.397                    |
| CD         | 0.777                    |
| IBD        | 0.665                    |

**Abbreviations:** IBD, inflammatory bowel disease; UC, ulcerative colitis; CD, Crohn's disease.

**Supplementary Table 10:** Heterogeneity of HbA1c-mediated *PPARG*

| Phenotypes | P value of heterogeneity |
|------------|--------------------------|
| UC         | 0.851                    |
| CD         | 0.434                    |
| IBD        | 0.551                    |

**Abbreviations:** HbA1c, Glycated hemoglobin A1c; IBD, inflammatory bowel disease; UC, ulcerative colitis; CD, Crohn's disease.

**Supplementary Table 11:** Results of colocalization analysis of T2D and CD in *KCNJ11* region

| PP.H0.abf                               | PP.H1.abf | P.H2.abf | PP.H3.abf | PP.H4.abf |
|-----------------------------------------|-----------|----------|-----------|-----------|
| 1.04e-21                                | 4.71e-02  | 2.10e-20 | 9.51e-01  | 2.29e-03  |
| [1] "pp abf for shared variant: 0.229%" |           |          |           |           |

**Abbreviations:** T2D, Type 2 Diabetes; CD, Crohn's disease.

**Supplementary Table 12: IVs included in association between T2D and CD**

| SNP         | effect_allele | other_allele | T2D     |        |        |           | CD       |        |          |         |
|-------------|---------------|--------------|---------|--------|--------|-----------|----------|--------|----------|---------|
|             |               |              | beta    | eaf    | se     | F value   | pval     | se     | pval     | beta    |
| rs1007090   | T             | C            | -0.044  | 0.3316 | 0.0068 | 41.868512 | 1.01E-10 | 0.0168 | 0.4956   | 0.0115  |
| rs10097617  | T             | C            | 0.0487  | 0.485  | 0.0064 | 57.902588 | 2.44E-14 | 0.0161 | 0.849    | 0.0031  |
| rs10406431  | A             | G            | 0.0603  | 0.5626 | 0.0065 | 86.061302 | 1.56E-20 | 0.0166 | 0.04497  | 0.0333  |
| rs10419627  | A             | G            | 0.0431  | 0.591  | 0.0065 | 43.967101 | 3.15E-11 | 0.0167 | 0.5309   | 0.0105  |
| rs10750397  | A             | G            | 0.0394  | 0.2829 | 0.0071 | 30.794684 | 3.13E-08 | 0.0178 | 0.1143   | -0.028  |
| rs10811660  | A             | G            | -0.1598 | 0.1704 | 0.0086 | 345.26825 | 2.54E-77 | 0.0212 | 0.1996   | -0.0272 |
| rs10938397  | A             | G            | -0.0414 | 0.5697 | 0.0065 | 40.567101 | 1.8E-10  | 0.0163 | 0.7382   | 0.0054  |
| rs10974438  | A             | C            | -0.0514 | 0.6416 | 0.0067 | 58.854088 | 1.71E-14 | 0.0171 | 0.09508  | 0.0285  |
| rs11048456  | T             | C            | -0.0454 | 0.7407 | 0.0072 | 39.760031 | 3.3E-10  | 0.0184 | 0.8099   | -0.0044 |
| rs11063029  | T             | C            | 0.0858  | 0.0581 | 0.0138 | 38.655955 | 5.36E-10 | 0.0365 | 0.9487   | 0.0023  |
| rs11187138  | A             | G            | 0.1094  | 0.5876 | 0.0065 | 283.27479 | 1E-63    | 0.0163 | 0.002206 | -0.0498 |
| rs11257655  | T             | C            | 0.0859  | 0.2169 | 0.0077 | 124.45286 | 1.46E-28 | 0.0197 | 0.748    | 0.0063  |
| rs1127215   | T             | C            | -0.0491 | 0.4153 | 0.0065 | 57.060592 | 3.92E-14 | 0.0162 | 0.1937   | 0.0211  |
| rs116425039 | A             | G            | -0.272  | 0.012  | 0.0348 | 61.091293 | 5.08E-15 | 0.089  | 0.1325   | 0.1338  |
| rs11680058  | A             | G            | 0.0581  | 0.8648 | 0.0104 | 31.209412 | 2.08E-08 | 0.0296 | 0.06304  | -0.055  |
| rs11708067  | A             | G            | 0.0882  | 0.775  | 0.0077 | 131.20661 | 5.05E-30 | 0.0192 | 0.9458   | 0.0013  |
| rs11709077  | A             | G            | -0.104  | 0.1264 | 0.0097 | 114.95377 | 1.26E-26 | 0.0249 | 0.7252   | -0.0087 |
| rs117233107 | A             | G            | -0.3596 | 0.0154 | 0.0295 | 148.59197 | 4.02E-34 | 0.0693 | 0.2531   | 0.0792  |
| rs11759026  | A             | G            | -0.066  | 0.768  | 0.0075 | 77.44     | 2.04E-18 | 0.0194 | 0.02437  | 0.0436  |
| rs11842871  | T             | G            | -0.04   | 0.2669 | 0.0073 | 30.024395 | 4.83E-08 | 0.0193 | 0.7568   | -0.006  |
| rs11856307  | A             | C            | 0.047   | 0.5706 | 0.0065 | 52.284024 | 4.48E-13 | 0.0163 | 0.5971   | -0.0086 |
| rs12001437  | T             | C            | -0.0402 | 0.6309 | 0.0066 | 37.099174 | 1.1E-09  | 0.0165 | 0.6427   | 0.0076  |
| rs12113073  | T             | C            | 0.0502  | 0.8176 | 0.0083 | 36.580636 | 1.29E-09 | 0.0203 | 0.4293   | -0.016  |
| rs12140153  | T             | G            | -0.0645 | 0.0953 | 0.0113 | 32.58086  | 1.17E-08 | 0.0308 | 0.02056  | -0.0714 |
| rs12325539  | T             | C            | -0.041  | 0.5998 | 0.0065 | 39.786982 | 2.69E-10 | 0.0164 | 0.6029   | 0.0086  |
| rs12719778  | T             | C            | 0.0381  | 0.5365 | 0.0065 | 34.357633 | 4.38E-09 | 0.0163 | 0.9048   | 0.0019  |
| rs12811407  | A             | G            | 0.0476  | 0.3317 | 0.007  | 46.24     | 1.16E-11 | 0.0177 | 0.1318   | -0.0267 |
| rs12910361  | A             | G            | -0.0814 | 0.2926 | 0.007  | 135.22367 | 3.95E-31 | 0.0174 | 0.01448  | 0.0426  |
| rs12912777  | T             | C            | 0.0773  | 0.1195 | 0.0101 | 58.575532 | 1.47E-14 | 0.0258 | 0.9149   | -0.0028 |
| rs13022337  | A             | G            | -0.0519 | 0.1715 | 0.0088 | 34.783187 | 3.61E-09 | 0.0209 | 0.5756   | 0.0117  |
| rs13266634  | T             | C            | -0.1075 | 0.3153 | 0.0069 | 242.72737 | 1.44E-54 | 0.0175 | 0.4494   | -0.0132 |
| rs13285209  | T             | C            | -0.0382 | 0.6768 | 0.0068 | 31.557958 | 1.99E-08 | 0.0173 | 0.1095   | -0.0278 |
| rs13330951  | A             | G            | 0.0361  | 0.5043 | 0.0064 | 31.81665  | 1.58E-08 | 0.016  | 0.8797   | 0.0024  |
| rs13385171  | T             | C            | 0.0357  | 0.4149 | 0.0065 | 30.165444 | 3.81E-08 | 0.0163 | 0.003942 | 0.047   |
| rs13389219  | T             | C            | -0.0605 | 0.4014 | 0.0065 | 86.633136 | 1.17E-20 | 0.0164 | 0.607    | 0.0084  |
| rs1359790   | A             | G            | -0.0817 | 0.2791 | 0.0071 | 132.41202 | 1.76E-30 | 0.0178 | 0.02986  | 0.0386  |
| rs1381937   | A             | C            | 0.0442  | 0.462  | 0.0064 | 47.696289 | 4.5E-12  | 0.0162 | 0.3729   | -0.0144 |
| rs141521721 | A             | C            | 0.1212  | 0.0233 | 0.0214 | 32.075814 | 1.39E-08 | 0.0533 | 0.3911   | -0.0457 |
| rs1421085   | T             | C            | -0.1218 | 0.5829 | 0.0065 | 351.12994 | 1.52E-78 | 0.0162 | 0.01622  | -0.0388 |
| rs1426371   | A             | G            | -0.0517 | 0.2659 | 0.0073 | 50.15744  | 1.74E-12 | 0.0188 | 0.07544  | -0.0334 |



---

|             |   |   |         |        |        |           |          |        |          |         |
|-------------|---|---|---------|--------|--------|-----------|----------|--------|----------|---------|
| rs1431841   | T | G | 0.0429  | 0.2113 | 0.0077 | 31.040816 | 3.08E-08 | 0.0196 | 0.5199   | 0.0126  |
| rs145678014 | T | G | -0.1048 | 0.0426 | 0.0163 | 41.3378   | 1.4E-10  | 0.0418 | 0.9501   | -0.0026 |
| rs1496653   | A | G | 0.0665  | 0.7887 | 0.0079 | 70.858036 | 2.49E-17 | 0.0197 | 0.08497  | -0.034  |
| rs150254892 | T | C | 0.1715  | 0.0226 | 0.0216 | 63.040659 | 1.85E-15 | 0.0553 | 0.9969   | -0.0002 |
| rs1573090   | T | G | 0.0458  | 0.5328 | 0.0065 | 49.648284 | 1.72E-12 | 0.0163 | 0.009858 | -0.042  |
| rs1705263   | A | C | -0.0484 | 0.4367 | 0.0064 | 57.191406 | 3.51E-14 | 0.016  | 0.1757   | -0.0217 |
| rs17522122  | T | G | 0.0356  | 0.474  | 0.0064 | 30.941406 | 2.49E-08 | 0.0166 | 0.6117   | -0.0084 |
| rs17772814  | A | G | -0.0746 | 0.0857 | 0.0125 | 35.617024 | 2.13E-09 | 0.0355 | 0.5952   | -0.0189 |
| rs17791513  | A | G | 0.1016  | 0.9323 | 0.0132 | 59.243343 | 1.35E-14 | 0.035  | 0.03247  | 0.075   |
| rs1783541   | T | C | 0.0608  | 0.201  | 0.0081 | 56.342631 | 4.65E-14 | 0.02   | 0.1579   | -0.0282 |
| rs1800961   | T | C | 0.1602  | 0.0349 | 0.0175 | 83.800947 | 5.1E-20  | 0.0494 | 0.8845   | 0.0072  |
| rs1801645   | T | C | -0.0482 | 0.7269 | 0.0075 | 41.302044 | 1.62E-10 | 0.0208 | 0.09421  | -0.0348 |
| rs2041965   | T | C | -0.0383 | 0.3556 | 0.0067 | 32.677434 | 1.09E-08 | 0.017  | 0.684    | -0.0069 |
| rs2080385   | T | G | -0.0551 | 0.2489 | 0.0074 | 55.442111 | 1.24E-13 | 0.0185 | 0.9166   | -0.0019 |
| rs2107133   | A | G | 0.0643  | 0.8727 | 0.0097 | 43.941864 | 4.02E-11 | 0.0246 | 0.5101   | 0.0162  |
| rs2215383   | T | C | -0.0641 | 0.4625 | 0.0064 | 100.31274 | 1.06E-23 | 0.016  | 0.663    | -0.007  |
| rs2237895   | A | C | -0.0892 | 0.573  | 0.0066 | 182.65932 | 1.15E-41 | 0.0169 | 0.7025   | 0.0065  |
| rs2290202   | T | G | 0.0666  | 0.1393 | 0.0092 | 52.405009 | 4.89E-13 | 0.0234 | 0.04822  | 0.0463  |
| rs2292662   | T | C | -0.0645 | 0.16   | 0.0088 | 53.722237 | 2.24E-13 | 0.0221 | 0.6792   | 0.0091  |
| rs2351707   | T | C | -0.0644 | 0.7178 | 0.007  | 84.64     | 4.3E-20  | 0.0179 | 0.7491   | 0.0057  |
| rs2383205   | A | G | -0.0533 | 0.4015 | 0.0065 | 67.24     | 2.2E-16  | 0.0165 | 0.2976   | 0.0171  |
| rs243019    | T | C | -0.0588 | 0.5359 | 0.0064 | 84.410156 | 3.37E-20 | 0.0163 | 0.6027   | -0.0085 |
| rs2767036   | A | C | -0.0389 | 0.7086 | 0.007  | 30.881837 | 2.94E-08 | 0.0175 | 0.02659  | 0.0388  |
| rs2785998   | A | C | -0.0554 | 0.3107 | 0.0069 | 64.464608 | 1.08E-15 | 0.0174 | 0.8604   | 0.0031  |
| rs2796441   | A | G | -0.0674 | 0.406  | 0.0065 | 107.52095 | 2.97E-25 | 0.0166 | 0.5115   | 0.0109  |
| rs2812545   | A | G | 0.0413  | 0.5206 | 0.0065 | 40.371361 | 1.99E-10 | 0.0172 | 0.2473   | -0.0198 |
| rs28544889  | A | C | 0.0549  | 0.3221 | 0.0069 | 63.306238 | 1.95E-15 | 0.0178 | 0.8012   | 0.0045  |
| rs28663084  | A | G | -0.0376 | 0.673  | 0.0068 | 30.574394 | 3.3E-08  | 0.0171 | 0.3516   | -0.0159 |
| rs2971669   | T | C | 0.0602  | 0.205  | 0.008  | 56.625625 | 3.87E-14 | 0.0195 | 0.1487   | 0.0281  |
| rs3019208   | A | G | 0.0397  | 0.6847 | 0.0068 | 34.084991 | 5.43E-09 | 0.017  | 0.6635   | -0.0074 |
| rs3094682   | A | C | -0.0619 | 0.1926 | 0.0082 | 56.984087 | 3.47E-14 | 0.0228 | 0.05175  | -0.0444 |
| rs320369    | A | G | 0.0372  | 0.3232 | 0.0068 | 29.927336 | 4.6E-08  | 0.0173 | 0.5963   | 0.0092  |
| rs329122    | A | G | 0.0366  | 0.4292 | 0.0065 | 31.705562 | 1.72E-08 | 0.0162 | 0.02774  | 0.0356  |
| rs340874    | T | C | -0.0678 | 0.449  | 0.0065 | 108.80095 | 1.56E-25 | 0.0161 | 0.5371   | 0.0099  |
| rs348330    | A | G | -0.0492 | 0.6399 | 0.0067 | 53.923814 | 2.1E-13  | 0.0172 | 0.04096  | 0.0353  |
| rs34990153  | A | G | 0.0476  | 0.5601 | 0.0065 | 53.627456 | 2.26E-13 | 0.0161 | 0.0386   | 0.0332  |
| rs35011184  | A | G | 0.2822  | 0.2306 | 0.0075 | 1415.766  | 1E-200   | 0.0195 | 0.8961   | 0.0025  |
| rs35251247  | A | G | 0.0505  | 0.2869 | 0.0071 | 50.590161 | 1.31E-12 | 0.0178 | 0.7026   | -0.0068 |
| rs35777422  | A | G | -0.0381 | 0.3559 | 0.0067 | 32.337046 | 1.3E-08  | 0.017  | 0.1534   | -0.0243 |
| rs35895680  | A | C | -0.0554 | 0.323  | 0.0069 | 64.464608 | 1.08E-15 | 0.0177 | 0.546    | -0.0107 |
| rs3768321   | T | G | 0.084   | 0.1993 | 0.008  | 110.25    | 4.75E-26 | 0.0203 | 0.01095  | 0.0515  |
| rs3786900   | A | G | 0.0434  | 0.7307 | 0.0072 | 36.334105 | 1.89E-09 | 0.0184 | 0.9705   | -0.0007 |
| rs3798519   | A | C | -0.0616 | 0.811  | 0.0082 | 56.433076 | 4.6E-14  | 0.0207 | 0.4833   | -0.0145 |
| rs429358    | T | C | 0.0746  | 0.8473 | 0.0091 | 67.203961 | 2.62E-16 | 0.0238 | 0.8472   | -0.0046 |

---

---

|            |   |   |         |        |        |           |          |        |           |         |
|------------|---|---|---------|--------|--------|-----------|----------|--------|-----------|---------|
| rs4368494  | A | G | -0.054  | 0.2976 | 0.007  | 59.510204 | 1.39E-14 | 0.0174 | 0.7607    | -0.0053 |
| rs465002   | T | C | 0.0718  | 0.7406 | 0.0073 | 96.739351 | 1.17E-22 | 0.0185 | 0.7886    | 0.005   |
| rs4679370  | T | C | -0.0365 | 0.4605 | 0.0064 | 32.525635 | 1.1E-08  | 0.0162 | 0.7899    | -0.0043 |
| rs4686471  | T | C | -0.0608 | 0.3887 | 0.0066 | 84.863177 | 3.05E-20 | 0.0165 | 0.3706    | -0.0148 |
| rs4688760  | T | C | 0.042   | 0.6828 | 0.007  | 36        | 2.14E-09 | 0.0176 | 0.9014    | -0.0022 |
| rs4709746  | T | C | -0.0567 | 0.1313 | 0.0096 | 34.883789 | 3.95E-09 | 0.0239 | 0.362     | -0.0218 |
| rs474513   | A | G | 0.0399  | 0.5162 | 0.0064 | 38.867432 | 4.18E-10 | 0.016  | 0.9835    | 0.0003  |
| rs4804833  | A | G | 0.048   | 0.3912 | 0.0066 | 52.892562 | 3.42E-13 | 0.0167 | 0.3468    | -0.0157 |
| rs4924559  | A | G | -0.0424 | 0.7038 | 0.007  | 36.68898  | 1.5E-09  | 0.0178 | 0.8574    | -0.0032 |
| rs4925109  | A | G | 0.0476  | 0.3177 | 0.0069 | 47.590002 | 5.65E-12 | 0.0171 | 0.3918    | -0.0147 |
| rs4977213  | T | C | -0.0507 | 0.6281 | 0.0069 | 53.990548 | 2.19E-13 | 0.0164 | 0.005263  | -0.0457 |
| rs505922   | T | C | -0.0473 | 0.6634 | 0.0068 | 48.384299 | 3.65E-12 | 0.0169 | 0.0005492 | -0.0583 |
| rs508419   | A | G | -0.0811 | 0.2356 | 0.0075 | 116.92818 | 5.43E-27 | 0.0184 | 0.3181    | -0.0183 |
| rs55653563 | A | C | 0.0435  | 0.7333 | 0.0072 | 36.501736 | 1.73E-09 | 0.0181 | 0.7352    | -0.0061 |
| rs56187241 | T | C | 0.1014  | 0.0451 | 0.0157 | 41.713498 | 1.07E-10 | 0.0429 | 0.6385    | 0.0202  |
| rs56823429 | A | C | -0.0519 | 0.7071 | 0.007  | 54.971633 | 1.38E-13 | 0.0177 | 0.4389    | 0.0137  |
| rs5758223  | A | G | 0.0401  | 0.7134 | 0.0071 | 31.898631 | 1.78E-08 | 0.0179 | 0.07507   | 0.0318  |
| rs576674   | A | G | -0.0538 | 0.8313 | 0.0086 | 39.135208 | 3.7E-10  | 0.0213 | 0.8897    | 0.003   |
| rs58432198 | T | C | -0.0636 | 0.1172 | 0.0103 | 38.127627 | 5.71E-10 | 0.0253 | 0.1127    | 0.0402  |
| rs58642235 | T | C | -0.0566 | 0.8612 | 0.0094 | 36.255772 | 1.9E-09  | 0.0242 | 0.928     | 0.0022  |
| rs62107261 | T | C | 0.1019  | 0.9541 | 0.0161 | 40.058678 | 2.62E-10 | 0.0406 | 0.1821    | 0.0541  |
| rs62563593 | A | G | -0.0394 | 0.6063 | 0.0065 | 36.742249 | 1.28E-09 | 0.0163 | 0.1611    | 0.0229  |
| rs6444809  | T | C | 0.0544  | 0.8723 | 0.0096 | 32.111111 | 1.63E-08 | 0.0243 | 0.2615    | 0.0272  |
| rs6459737  | A | G | -0.0583 | 0.338  | 0.0067 | 75.715972 | 3.31E-18 | 0.0167 | 0.1177    | -0.0262 |
| rs6545714  | A | G | -0.0363 | 0.6081 | 0.0065 | 31.187929 | 2.25E-08 | 0.0162 | 0.3286    | -0.0158 |
| rs6600191  | T | C | 0.0587  | 0.8246 | 0.0085 | 47.691211 | 4.47E-12 | 0.0205 | 0.5997    | 0.0108  |
| rs6687271  | A | C | -0.0402 | 0.7521 | 0.0073 | 30.325389 | 4.14E-08 | 0.0186 | 0.6838    | -0.0076 |
| rs670323   | A | G | 0.0541  | 0.2003 | 0.008  | 45.731406 | 1.06E-11 | 0.02   | 0.9223    | -0.002  |
| rs672271   | T | C | -0.06   | 0.9062 | 0.011  | 29.752066 | 4.83E-08 | 0.0283 | 0.3191    | 0.0282  |
| rs67232546 | T | C | 0.0531  | 0.2047 | 0.008  | 44.056406 | 2.51E-11 | 0.0198 | 0.06951   | -0.036  |
| rs67516930 | T | C | -0.0366 | 0.5413 | 0.0064 | 32.704102 | 1E-08    | 0.0161 | 0.02185   | -0.037  |
| rs6821438  | A | G | 0.0397  | 0.5342 | 0.0064 | 38.47876  | 5.1E-10  | 0.016  | 0.01317   | -0.0395 |
| rs6937438  | A | G | -0.0514 | 0.7112 | 0.007  | 53.917551 | 2.35E-13 | 0.0176 | 0.3186    | -0.0176 |
| rs702634   | A | G | 0.0503  | 0.689  | 0.0069 | 53.141987 | 3.37E-13 | 0.0172 | 0.3644    | -0.0156 |
| rs7178762  | T | C | -0.0387 | 0.5364 | 0.0064 | 36.564697 | 1.37E-09 | 0.016  | 0.005028  | 0.045   |
| rs7223643  | A | G | -0.0516 | 0.8056 | 0.0081 | 40.581619 | 1.55E-10 | 0.0201 | 0.6241    | 0.0099  |
| rs7240767  | T | C | -0.0372 | 0.626  | 0.0066 | 31.768595 | 1.71E-08 | 0.0166 | 0.3236    | 0.0164  |
| rs7313918  | T | C | -0.0559 | 0.8635 | 0.0094 | 35.364531 | 2.99E-09 | 0.0245 | 0.5434    | 0.0149  |
| rs7325671  | T | C | 0.0545  | 0.1264 | 0.0096 | 32.229275 | 1.53E-08 | 0.0243 | 0.5384    | 0.0149  |
| rs73883378 | T | C | 0.0821  | 0.9132 | 0.0115 | 50.967183 | 1.02E-12 | 0.0285 | 0.6163    | -0.0143 |
| rs739846   | A | G | 0.0877  | 0.0761 | 0.0119 | 54.313184 | 2.02E-13 | 0.0306 | 0.4868    | 0.0213  |
| rs757110   | A | C | -0.0691 | 0.6279 | 0.0066 | 109.61455 | 1.12E-25 | 0.0166 | 0.002017  | 0.0514  |
| rs7633675  | T | G | -0.1085 | 0.6837 | 0.0068 | 254.59018 | 3.21E-57 | 0.0171 | 0.03271   | -0.0365 |
| rs7667864  | A | C | -0.0402 | 0.2838 | 0.0071 | 32.057925 | 1.64E-08 | 0.0179 | 0.5419    | -0.0109 |

---

|            |   |   |         |        |        |           |          |        |        |         |
|------------|---|---|---------|--------|--------|-----------|----------|--------|--------|---------|
| rs7732130  | A | G | -0.0606 | 0.6992 | 0.007  | 74.946122 | 5.69E-18 | 0.0176 | 0.5985 | -0.0093 |
| rs77864822 | A | G | 0.0753  | 0.9295 | 0.0129 | 34.073012 | 5.01E-09 | 0.0337 | 0.6984 | -0.013  |
| rs7966976  | A | G | -0.0751 | 0.1964 | 0.0081 | 85.962658 | 1.22E-20 | 0.0204 | 0.4146 | 0.0166  |
| rs79677630 | T | G | -0.1    | 0.9613 | 0.0168 | 35.430839 | 2.38E-09 | 0.0448 | 0.5295 | 0.0281  |
| rs8008910  | A | G | 0.0554  | 0.2192 | 0.0076 | 53.136427 | 4.22E-13 | 0.0194 | 0.3756 | 0.0171  |
| rs8071043  | T | C | -0.0523 | 0.6738 | 0.0068 | 59.154196 | 1.53E-14 | 0.0171 | 0.2408 | -0.0201 |
| rs8097210  | T | G | -0.0537 | 0.7325 | 0.0072 | 55.626736 | 1.06E-13 | 0.0181 | 0.238  | -0.0214 |
| rs8192675  | T | C | 0.0659  | 0.7121 | 0.007  | 88.628776 | 5.77E-21 | 0.0175 | 0.6272 | 0.0085  |
| rs9665898  | T | C | -0.0525 | 0.1361 | 0.0094 | 31.193413 | 2.53E-08 | 0.0232 | 0.5309 | -0.0145 |

**Abbreviations:** IVs, instrumental variables; T2D, Type 2 Diabetes; SNP, single nucleotide polymorphism; CD, Crohn's disease.

**Supplementary Table 13:** Causal relationship between T2D and CD

| Phenotype | nSNP | Method   | OR (95%CI)           | P value | P value of Cochran's Q test | MR-Egger intercept (P value) |
|-----------|------|----------|----------------------|---------|-----------------------------|------------------------------|
| CD        | 137  | MR Egger | 1.010 (0.875, 1.167) | 0.890   | 0.000000723                 | 0.0003 (0.934)               |
|           |      | WM       | 1.012 (0.915, 1.120) | 0.811   |                             |                              |
|           |      | IVW      | 1.016 (0.953, 1.083) | 0.631   |                             |                              |

**Abbreviations:** T2D, Type 2 Diabetes; CD, Crohn's disease; SNP, single nucleotide polymorphism; WM, weighted median; IVW, inverse-variance weighted; OR, odd ratio; CI, confidence interval.

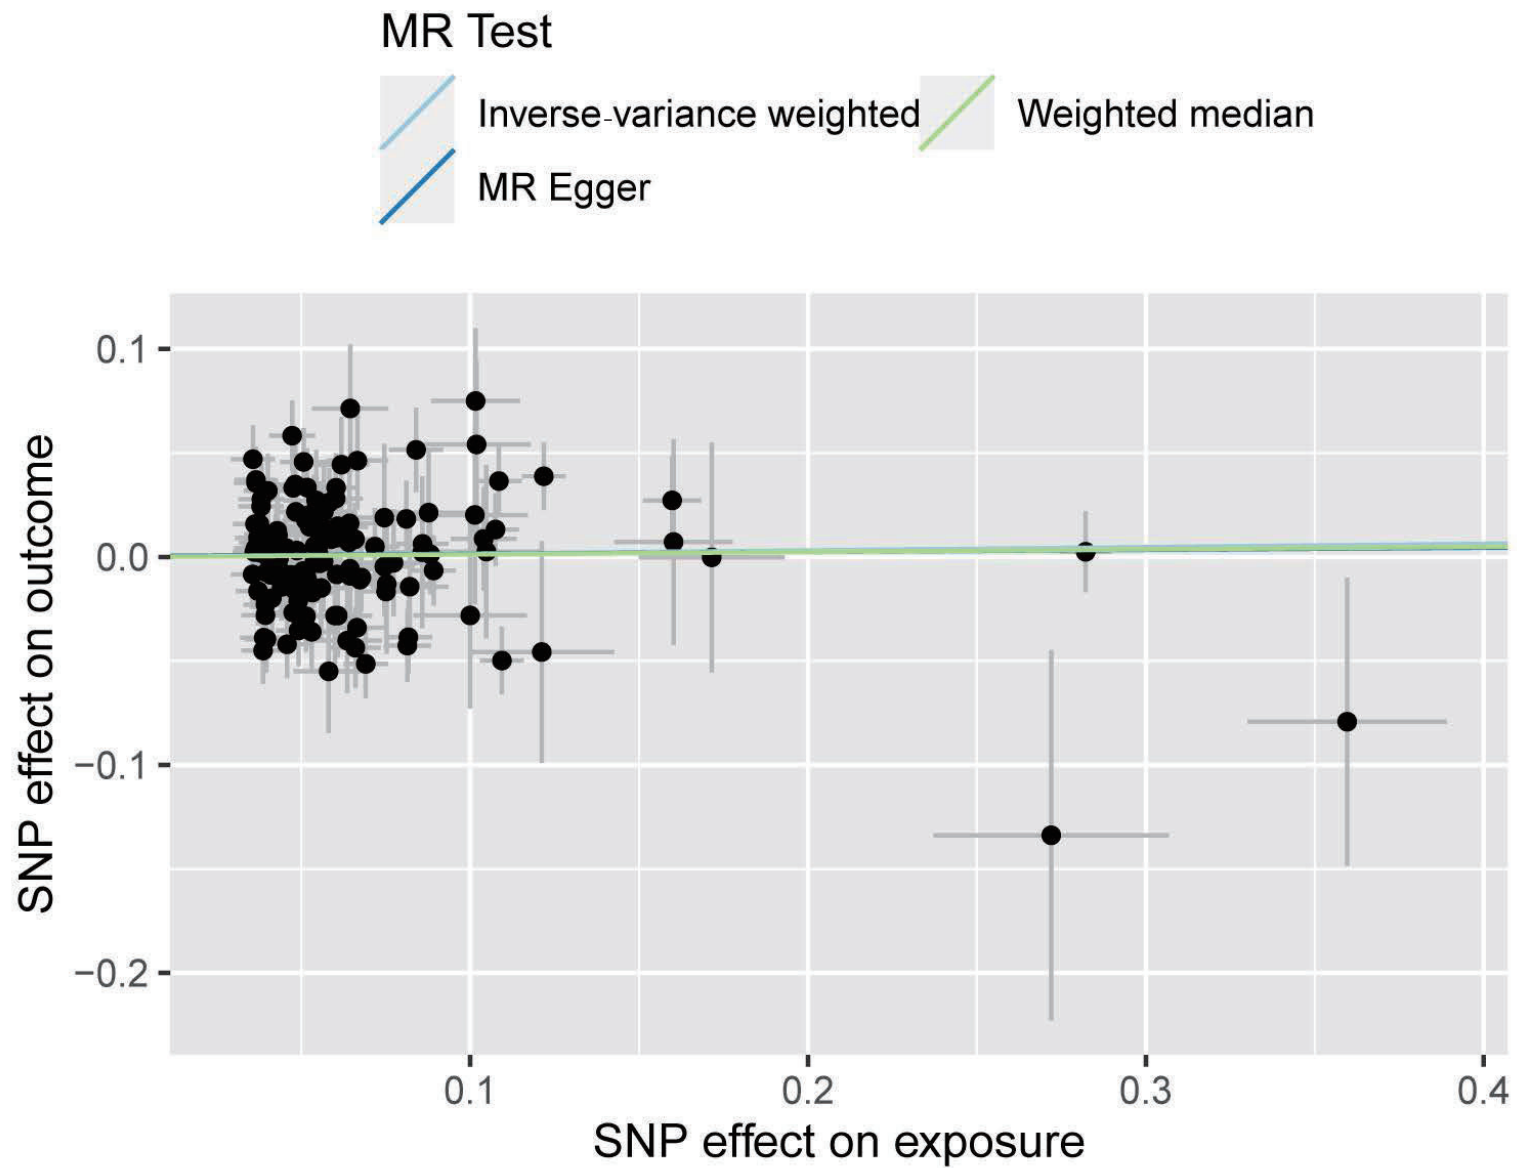

**Supplementary Figure 1:** Visualization of the relationship between T2D and CD

**Abbreviations:** T2D, Type 2 Diabetes; CD, Crohn's disease; SNP, single nucleotide polymorphism.

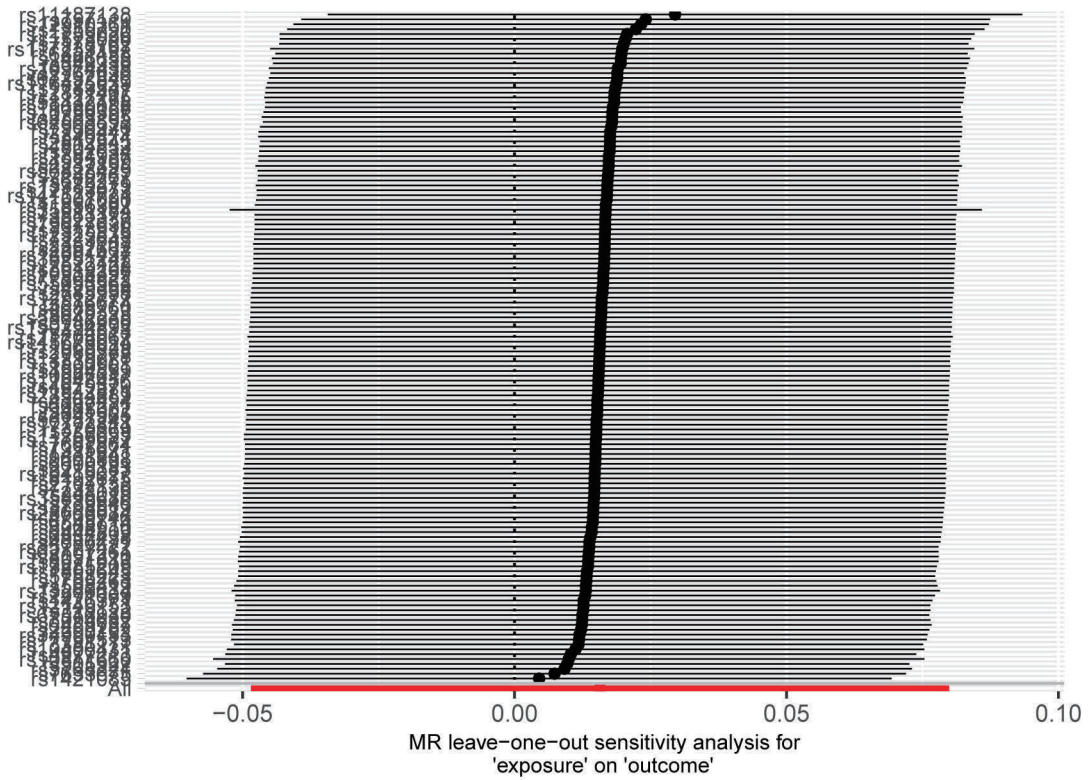

**Supplementary Figure 2:** Results of the leave-one-out method for the relationship between T2D and CD

**Abbreviations:** T2D, Type 2 Diabetes; CD, Crohn's disease.
